# Supplementary figures and images for: Suppression of Notch signalling by the COUP-TFII transcription factor regulates vein identity
Source: Springer Nature journal article supplement (doi:10.1038/nature03511), 2005-05-01

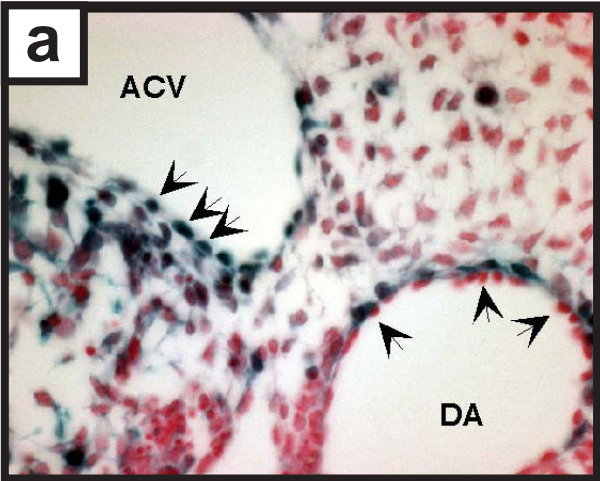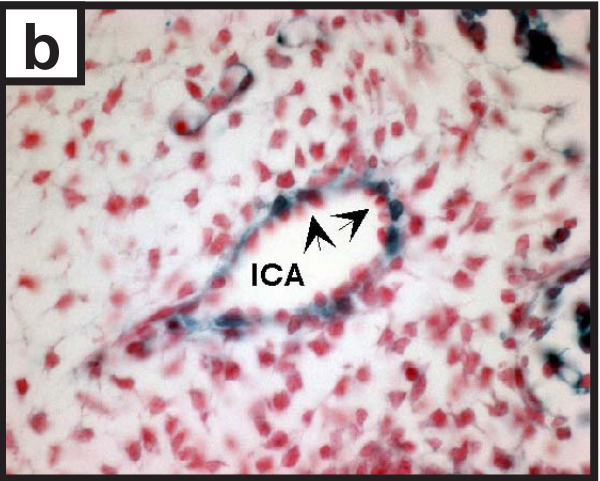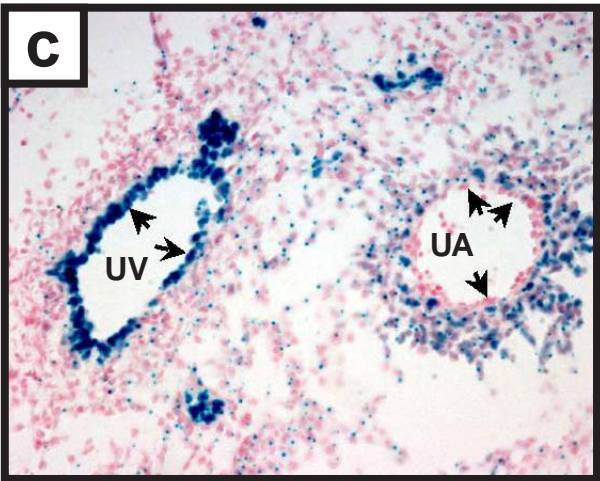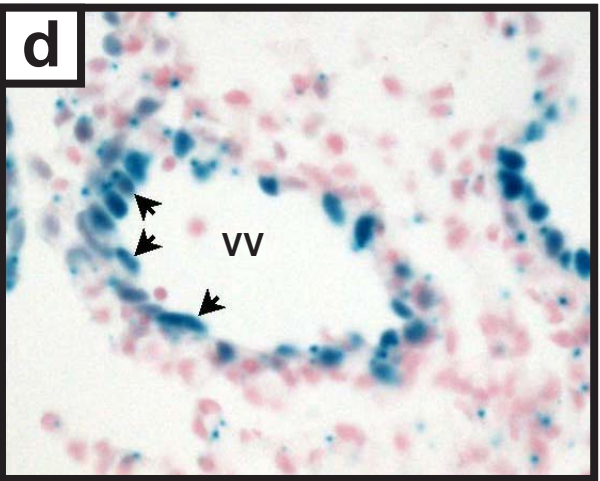

Supplement: 41586_2005_BFnature03511_MOESM1_ESM.pdf [file 41586_2005_BFnature03511_MOESM1_ESM.pdf]

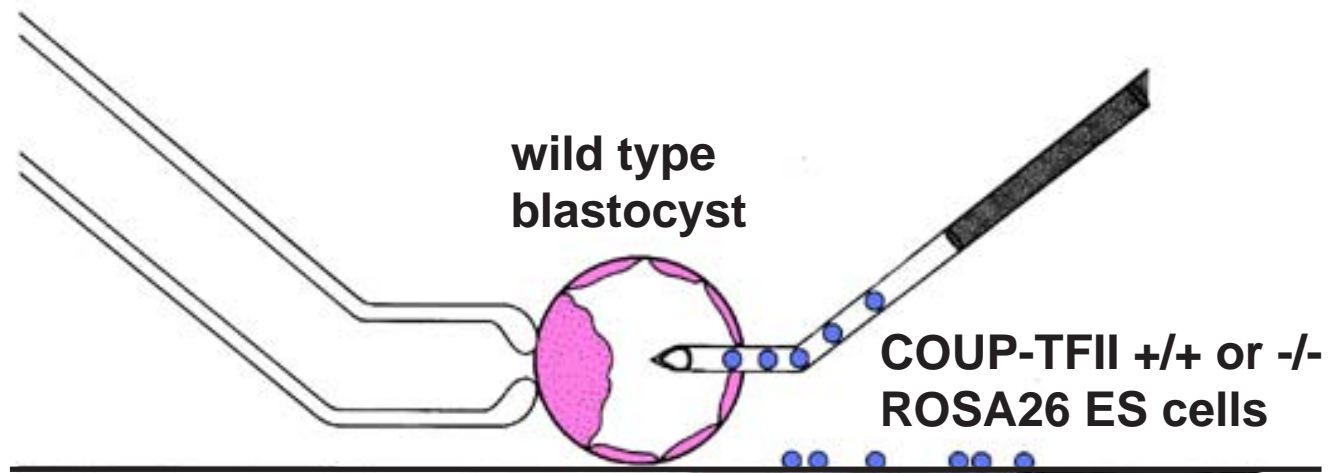

cell autonomous

non- cell autonomous

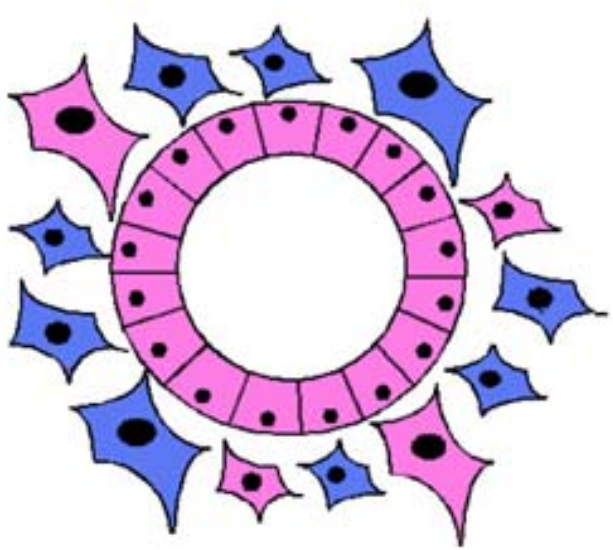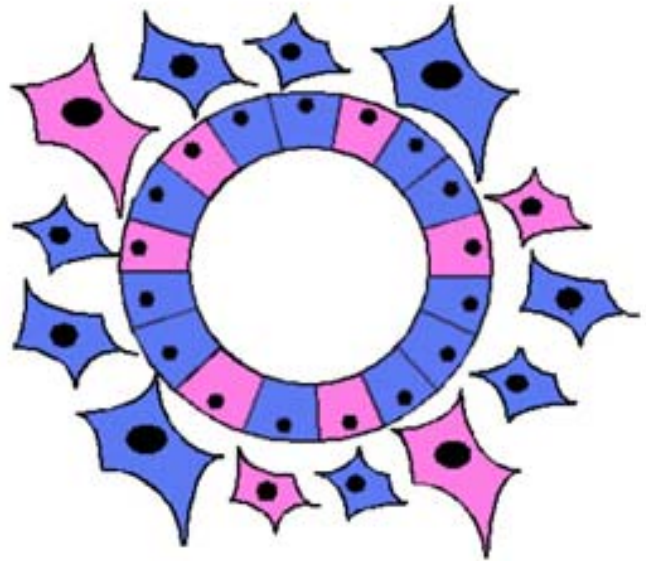

Supplement: 41586_2005_BFnature03511_MOESM2_ESM.pdf [file 41586_2005_BFnature03511_MOESM2_ESM.pdf]

**a**

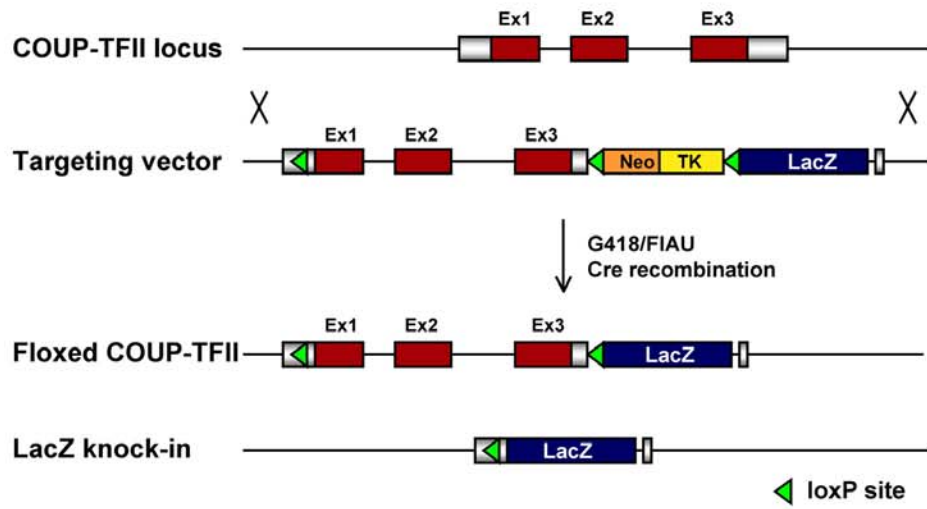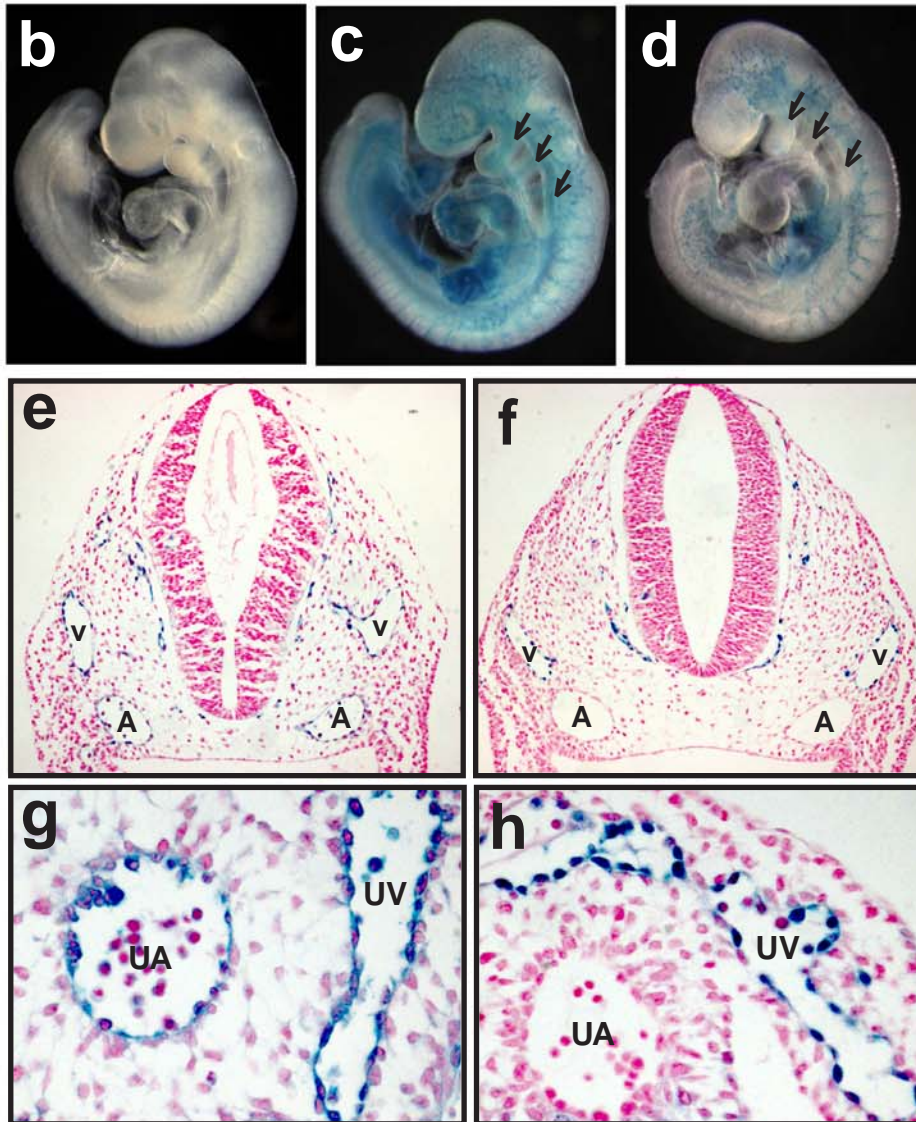

Supplement: 41586_2005_BFnature03511_MOESM3_ESM.pdf [file 41586_2005_BFnature03511_MOESM3_ESM.pdf]

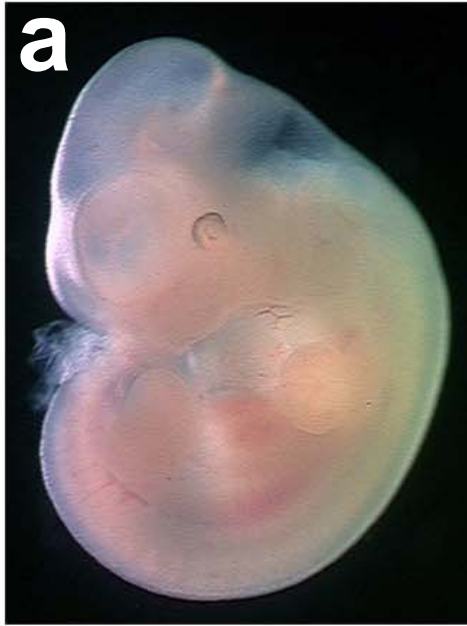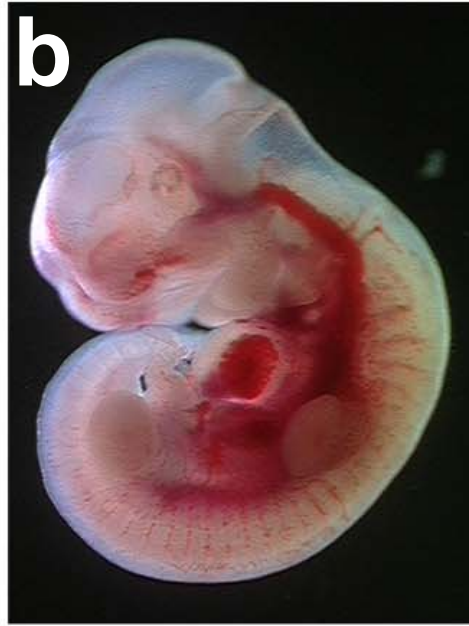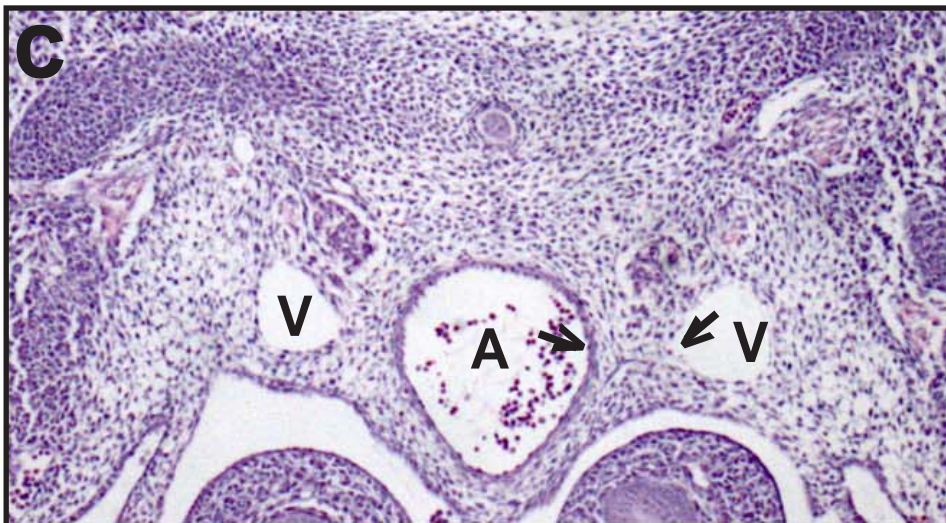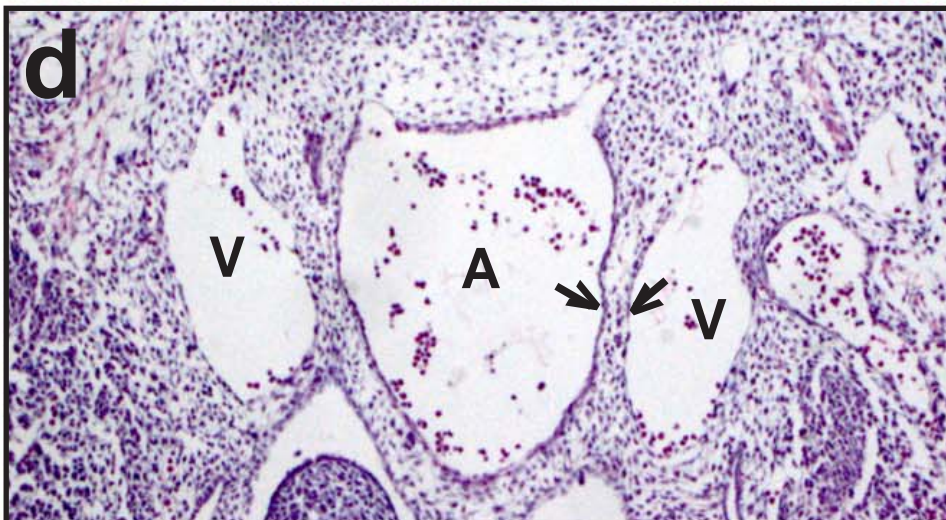

Supplement: 41586_2005_BFnature03511_MOESM4_ESM.pdf [file 41586_2005_BFnature03511_MOESM4_ESM.pdf]

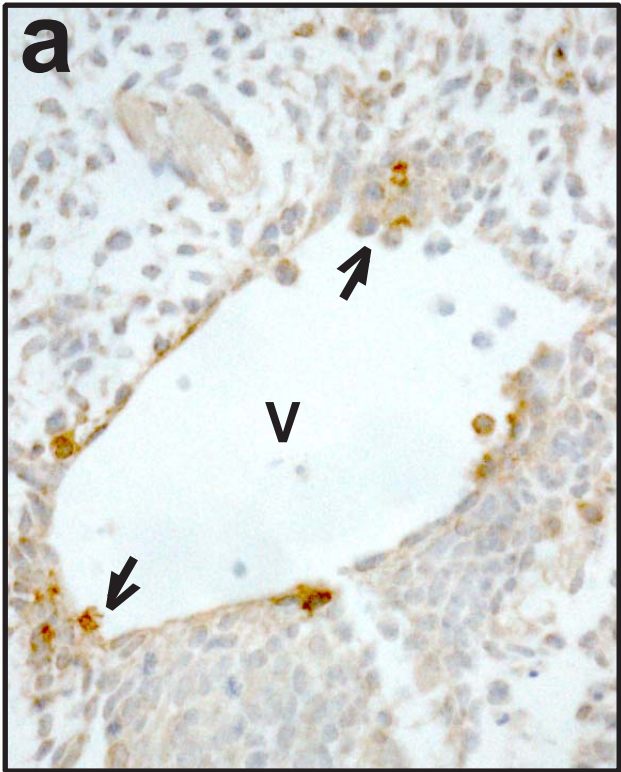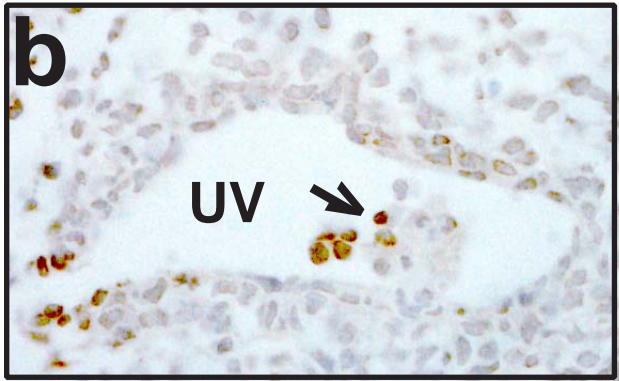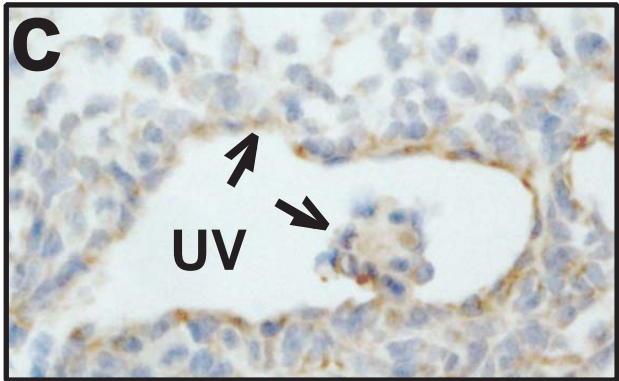

Supplement: 41586_2005_BFnature03511_MOESM5_ESM.pdf [file 41586_2005_BFnature03511_MOESM5_ESM.pdf]
